# Supplementary material for: Evaluation of Chemical Changes in Laboratory-Induced Colistin-Resistant Klebsiella pneumoniae
Source: MDPI journal article supplement (doi:10.3390/ijms22137104), 2021-07-01
Supplement: s1 [file s1]

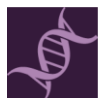

Supplementary Table S1

| Figure 2 | Starting wavenumber [cm <sup>-1</sup> ] | Ending wavenumber [cm <sup>-1</sup> ] | <i>Klebsiella pneumoniae</i> <sup>Col-R</sup><br>peak area<br>[A · cm <sup>-1</sup> ]     | <i>Klebsiella pneumoniae</i> <sup>Col-S</sup><br>peak area<br>[A · cm <sup>-1</sup> ]       |
|----------|-----------------------------------------|---------------------------------------|-------------------------------------------------------------------------------------------|---------------------------------------------------------------------------------------------|
|          | 3663                                    | 3115                                  | 192.6026                                                                                  | 151.8776                                                                                    |
|          | 3102                                    | 3002                                  | 46.5249                                                                                   | 42.8085                                                                                     |
|          | 2945                                    | 2884                                  | 32.2048                                                                                   | 31.0923                                                                                     |
|          | 1719                                    | 1579                                  | 93.2991                                                                                   | 82.4637                                                                                     |
|          | 1579                                    | 1474                                  | 71.3844                                                                                   | 63.6642                                                                                     |
|          | 1459                                    | 1420                                  | 17.1443                                                                                   | 16.4015                                                                                     |
|          | 1269                                    | 1181                                  | 11.9993                                                                                   | 9.7758                                                                                      |
|          | 1181                                    | 908                                   | 101.1301                                                                                  | 91.3327                                                                                     |
|          | 908                                     | 842                                   | 0.3504                                                                                    | 4.383                                                                                       |
| Figure 3 | Starting wavenumber [cm <sup>-1</sup> ] | Ending wavenumber [cm <sup>-1</sup> ] | LPS <sup><i>Klebsiella pneumoniae</i>_Col-R</sup><br>peak area<br>[A · cm <sup>-1</sup> ] | LPS <sup><i>Klebsiella pneumoniae</i>_Col-S</sup><br>peak area<br>[A · cm <sup>-1</sup> ]   |
|          | 3684                                    | 2962                                  | 141.5303                                                                                  | 183.245                                                                                     |
|          | 2962                                    | 2888                                  | 16.9926                                                                                   | 21.2674                                                                                     |
|          | 2888                                    | 2831                                  | 11.2973                                                                                   | 14.0268                                                                                     |
|          | 1800                                    | 1200                                  | 56.3114                                                                                   | 77.5749                                                                                     |
|          | 1200                                    | 905                                   | 181.5496                                                                                  | 166.7721                                                                                    |
|          | 905                                     | 870                                   | 8.6144                                                                                    | 7.3886                                                                                      |
| Figure 4 | Starting wavenumber [cm <sup>-1</sup> ] | Ending wavenumber [cm <sup>-1</sup> ] | <i>Klebsiella pneumoniae</i> <sup>Col-R</sup><br>peak area<br>[I · cm <sup>-1</sup> ]     | <i>Klebsiella pneumoniae</i> <sup>Col-S</sup><br>peak's area<br>[I · cm <sup>-1</sup> ]     |
|          | 3000                                    | 2820                                  | 3.3062                                                                                    | 3.0529                                                                                      |
|          | 2579                                    | 2200                                  | 5.8778                                                                                    | 5.2116                                                                                      |
|          | 2200                                    | 1774                                  | 13.5404                                                                                   | 13.2205                                                                                     |
|          | 1774                                    | 1505                                  | 12.1232                                                                                   | 11.4199                                                                                     |
|          | 1505                                    | 1339                                  | 7.4726                                                                                    | 7.178                                                                                       |
|          | 1339                                    | 903                                   | 21.5799                                                                                   | 19.3367                                                                                     |
|          | 903                                     | 650                                   | 12.2211                                                                                   | 9.943                                                                                       |
| Figure 5 | Starting wavenumber [cm <sup>-1</sup> ] | Ending wavenumber [cm <sup>-1</sup> ] | LPS <sup><i>Klebsiella pneumoniae</i>_Col-R</sup> peak<br>area<br>[I · cm <sup>-1</sup> ] | LPS <sup><i>Klebsiella pneumoniae</i>_Col-S</sup> peak's<br>area<br>[I · cm <sup>-1</sup> ] |
|          | 3028                                    | 2918                                  | 34.7454                                                                                   | 42.5528                                                                                     |
|          | 2918                                    | 2789                                  | 31.3738                                                                                   | 37.0259                                                                                     |
|          | 1674                                    | 1519                                  | 9.418                                                                                     | 12.4515                                                                                     |
|          | 1519                                    | 1358                                  | 15.657                                                                                    | 21.6373                                                                                     |
|          | 1164                                    | 969                                   | 19.0405                                                                                   | 22.3885                                                                                     |
|          | 800                                     | 704                                   | 8.8463                                                                                    | 10.1588                                                                                     |
|          | 458                                     | 399                                   | 17.6113                                                                                   | 4.4542                                                                                      |
|          | 399                                     | 309                                   | 1.2378                                                                                    | 8.7034                                                                                      |
